# Supplementary material
Source: Research Square preprint supplement (doi:10.21203/rs.3.rs-9712580/v1)

**Fig.S1** Diagram of root morphology of sorghum genetic-stocks differing in sorgoleone production under various forms of nitrogen application in paper culture experiments. (a) High sorgoleone genetic-stock; (b) Low sorgoleone genetic-stock.


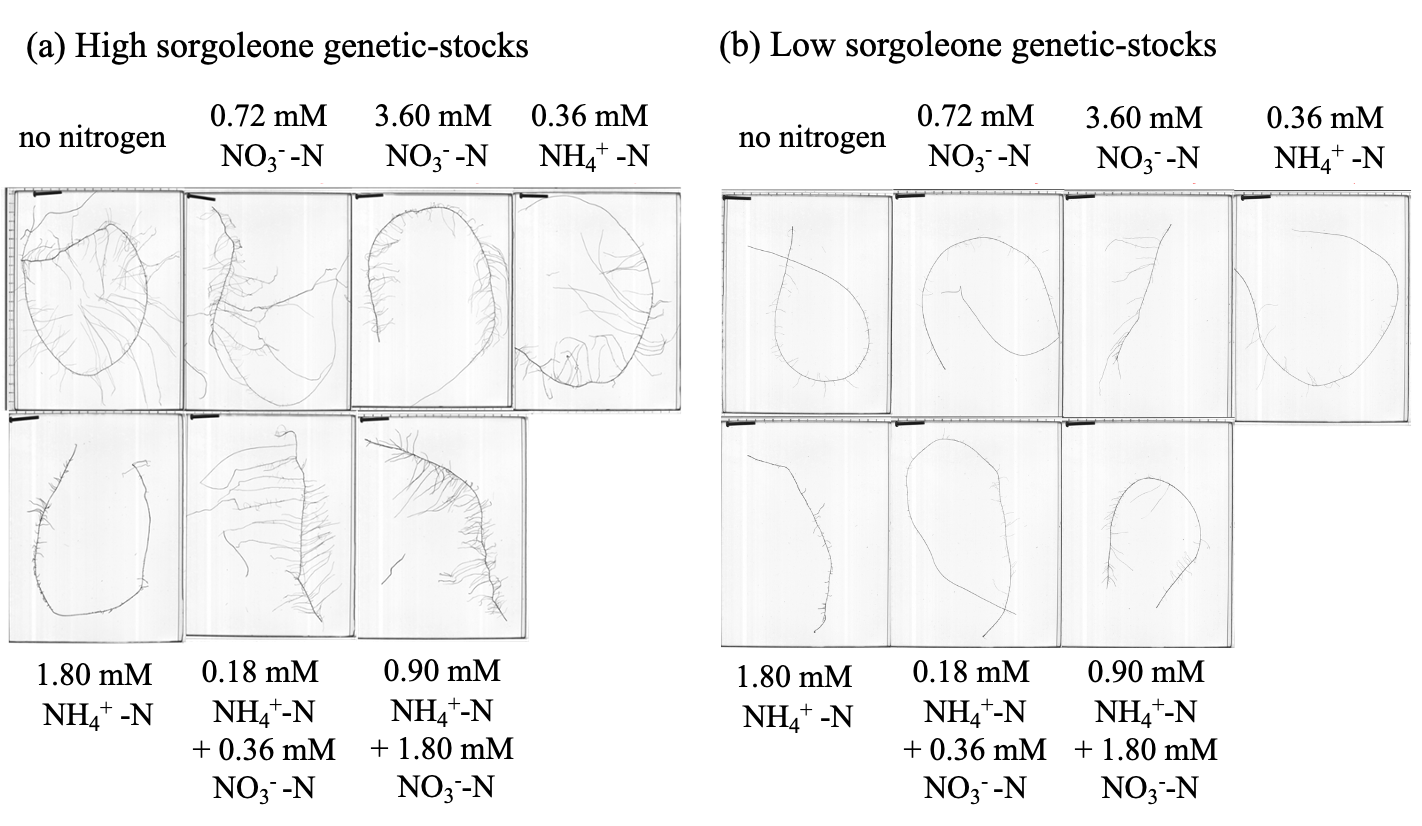

Supplement: Supplementary file 1 [file 8ad6fb02f4e2dde4e551a2ea.docx]
